# Supplementary material for: The Gut Microbiome among Postmenopausal Latvian Women in Relation to Dietary Habits
Source: MDPI journal article supplement (doi:10.3390/nu14173568), 2022-08-30
Supplement: s1 [file s1]

## Supplementary materials:

**Table S1.** Categories of food products and beverages.

| Category                                    | Examples of products from the specific category                                                                                                                        |
|---------------------------------------------|------------------------------------------------------------------------------------------------------------------------------------------------------------------------|
| Grains, grain-based products                | Pasta, oats, rice, breakfast cereals, muesli, etc.                                                                                                                     |
| Bread                                       | White bread, rye bread, seed bread                                                                                                                                     |
| Potatoes                                    | Boiled, fried potatoes, French fries                                                                                                                                   |
| Meat, offal                                 | Pork, beef, lamb, poultry, liver                                                                                                                                       |
| Meat products                               | Sausages, smoked meat, canned meat                                                                                                                                     |
| Eggs                                        | Hen eggs, quail eggs                                                                                                                                                   |
| Fish                                        | Freshwater fish, seawater fish                                                                                                                                         |
| Fish products                               | Canned fish, fish sticks, smoked fish                                                                                                                                  |
| Milk and milk products                      | Milk, kefir, buttermilk, yoghurt, sour cream, cottage cheese, cheese, etc.                                                                                             |
| Vegetable oils, plant and animal-based fats | Olive oil, other vegetable oils, margarine, butter, etc.                                                                                                               |
| Vegetables                                  | Fresh and cooked vegetables                                                                                                                                            |
| Fruits, berries                             | Fresh and dried fruits, fresh berries                                                                                                                                  |
| Mushrooms                                   | Wild and cultivated edible mushrooms                                                                                                                                   |
| Legumes, nuts, seeds, milk alternatives     | Beans, peas, lentils, soy and its products, nuts, peanuts and peanut butter, plant-based drinks, tofu, vegan cheese, etc.                                              |
| Sweets, bakery goods                        | Pastries, cookies, chocolate and other candies, etc.                                                                                                                   |
| Condiments                                  | Sugar, honey, sugar substitutes, soy sauce, mayonnaise                                                                                                                 |
| Fast food, salty snacks                     | Hamburgers, pizza, dumplings, instant soups, potato and corn chips                                                                                                     |
| Lemonades, energy drinks                    | Lemonades with and without caffeine and sugar, energy drinks                                                                                                           |
| Coffee                                      | Filtered coffee, instant coffee, etc.                                                                                                                                  |
| Tea                                         | Black tea, green tea, herbal tea, etc.                                                                                                                                 |
| Water                                       | Tap water                                                                                                                                                              |
| Dietary supplements                         | Fish oil, multivitamins, iron, calcium, vitamin D, vitamin C, magnesium, B group vitamins, probiotics, fibre supplements, meal replacements, other dietary supplements |

**Table S2.** Calculated average daily intake (g per day)<sup>1</sup> of food products and beverages based on data from the food frequency questionnaire (*n* = 52).

| <b>Food products or beverages</b>            | <b>Control group (<i>n</i> = 26)</b> | <b>Experimental groups (<i>n</i> = 26)</b> |
|----------------------------------------------|--------------------------------------|--------------------------------------------|
| Grains, grain-based products                 | 82.11 ± 101.77 (3.66–482.22)         | 65.87 ± 65.54 (1.74–313.78)                |
| Bread                                        | 11.34 ± 9.38 (0.27–31.06)            | 12.20 ± 10.36 (0.00–40.79)                 |
| Potatoes                                     | 38.38 ± 31.70 (3.95–120.00)          | 54.36 ± 38.40 (0.00–147.78)                |
| Meat, offal                                  | 63.00 ± 50.15 (0.00–230.55)          | 81.83 ± 49.93 (0.00–198.58)                |
| Meat products                                | 7.81 ± 8.96 (0.00–31.66)             | 14.48 ± 15.60 (0.00–70.52)                 |
| Eggs                                         | 29.53 ± 31.19 (1.97–150.33)          | 27.27 ± 15.27 (4.93–60.08)                 |
| Fish                                         | 31.98 ± 39.56 (0.82–200.00)          | 28.77 ± 31.27 (3.56–156.71)                |
| Fish products                                | 9.25 ± 15.69 (0.22–68.55)            | 7.05 ± 12.21 (0.25–62.68)                  |
| Milk and milk products                       | 320.78 ± 245.75 (11.84–875.62)       | 344.08 ± 188.47 (0.00–824.52)              |
| Vegetable oils, plant- and animal-based fats | 14.65 ± 11.91 (1.38–54.87)           | 11.82 ± 5.49 (1.49–25.61)                  |
| Vegetables                                   | 124.00 ± 64.00 (23.67–280.00)        | 177.62 ± 138.69 (39.89–700.00)             |
| Fruits, berries                              | 170.96 ± 150.54 (12.82–525.00)       | 158.31 ± 125.77 (22.93–464.96)             |
| Mushrooms                                    | 2.17 ± 2.24 (0.08–6.41)              | 1.31 ± 1.70 (0.00–6.41)                    |
| Legumes, nuts, seeds, milk alternatives      | 35.36 ± 37.37 (2.38–144.05)          | 32.86 ± 35.96 (0.25–162.96)                |
| Sweets, bakery goods                         | 15.45 ± 15.41 (0.00–59.18)           | 21.78 ± 21.09 (0.00–67.32)                 |
| Condiments                                   | 6.54 ± 7.12 (0.00–23.63)             | 6.82 ± 5.65 (0.00–20.62)                   |
| Fast food, salty snacks                      | 14.92 ± 23.34 (0.00–104.49)          | 11.12 ± 16.15 (0.44–71.12)                 |
| Lemonades, energy drinks                     | 15.70 ± 25.99 (0.00–110.30)          | 29.32 ± 51.10 (0.00–220.00)                |
| Coffee                                       | 313.57 ± 267.07 (0.00–1080.00)       | 445.68 ± 228.70 (119.67–1080.00)           |
| Tea                                          | 260.75 ± 320.18 (0.00–1440.00)       | 270.08 ± 219.77 (1.97–600.00)              |
| Water                                        | 877.58 ± 398.64 (47.01–1320.00)      | 941.63 ± 417.55 (172.38–1320.00)           |

<sup>1</sup> Mean ± standard deviation (minimal–maximal value).

**Table S3.** Significant correlations between food, beverage intake and gut microbiome.

| Food products or beverages                   | Taxonomic gut microbiome composition  | Spearman's rank correlation coefficient ( $\rho$ ), $p$ -value |
|----------------------------------------------|---------------------------------------|----------------------------------------------------------------|
| Grains, grain-based products                 | genus <i>Bifidobacterium</i>          | $\rho = 0.517, p = 0.002$                                      |
|                                              | genus <i>Atopobium</i>                | $\rho = 0.513, p = 0.003$                                      |
| Potatoes                                     | <i>Enterobacter</i> spp.              | $\rho = -0.532, p = 0.002$                                     |
| Meat, offal                                  | genus <i>Gastranaerophilales</i>      | $\rho = -0.500, p = 0.004$                                     |
|                                              | genus <i>Victivallis</i>              | $\rho = -0.600, p < 0.0001$                                    |
|                                              | genus <i>Anaeroplasma</i>             | $\rho = -0.521, p = 0.002$                                     |
|                                              | genus <i>Terrisporobacter</i>         | $\rho = -0.571, p = 0.001$                                     |
|                                              | genus <i>Enterobacter</i>             | $\rho = -0.521, p = 0.002$                                     |
|                                              | order <i>Coriobacteriales</i>         | $\rho = 0.511, p = 0.003$                                      |
| Fish                                         |                                       |                                                                |
| Milk and milk products                       | <i>Subdoligranulum</i> spp.           | $\rho = 0.500, p = 0.004$                                      |
| Vegetable oils, plant- and animal-based fats | genus <i>Campylobacter</i>            | $\rho = 0.528, p = 0.002$                                      |
|                                              | genus <i>Fusobacterium</i>            | $\rho = 0.528, p = 0.002$                                      |
|                                              | genus <i>Leptotrichia</i>             | $\rho = 0.528, p = 0.002$                                      |
|                                              | genus <i>Porhphyromonas</i>           | $\rho = 0.528, p = 0.002$                                      |
|                                              | genus <i>Faecalitalea</i>             | $\rho = 0.528, p = 0.002$                                      |
|                                              | genus <i>Gemelia</i>                  | $\rho = 0.521, p = 0.002$                                      |
|                                              | genus <i>Epulopiscium</i>             | $\rho = 0.528, p = 0.002$                                      |
|                                              | genus <i>Hungatella</i>               | $\rho = 0.514, p = 0.003$                                      |
|                                              | genus <i>Parvimonas</i>               | $\rho = 0.525, p = 0.002$                                      |
|                                              | family <i>Veillonellaceae</i>         | $\rho = 0.529, p = 0.002$                                      |
|                                              | family <i>Oscillospiraceae</i>        | $\rho = -0.542, p = 0.001$                                     |
|                                              | <i>Paludicola</i> spp.                | $\rho = 0.539, p = 0.001$                                      |
|                                              |                                       |                                                                |
|                                              |                                       |                                                                |
| Legumes, nuts, seeds, milk alternatives      | <i>Citrobacter</i> spp.               | $\rho = -0.518, p = 0.002$                                     |
| Sweets, bakery goods                         | <i>Mitsuokella</i> spp.               | $\rho = -0.527, p = 0.002$                                     |
| Condiments                                   | <i>Anaerotruncus</i> spp.             | $\rho = 0.576, p = 0.001$                                      |
| Coffee                                       | genus <i>Gastranaerophilales</i>      | $\rho = -0.590, p < 0.0001$                                    |
|                                              | genus <i>Victivallis</i>              | $\rho = -0.514, p = 0.003$                                     |
|                                              | genus <i>Anaeroplasma</i>             | $\rho = -0.558, p = 0.001$                                     |
| Tea                                          | <i>Coprobacter</i> spp.               | $\rho = -0.645, p < 0.0001$                                    |
| Water                                        | Family <i>Methanomethylophilaceae</i> | $\rho = -0.579, p = 0.001$                                     |

**Table S4.** Dietary habits and gut microbiome composition related profiles based on principal component analysis.

| Microorganisms at phylum level                | First profile<br>(eigenvalue = 3.05) | Second profile<br>(eigenvalue = 2.29) | Third profile<br>(eigenvalue = 1.43) |
|-----------------------------------------------|--------------------------------------|---------------------------------------|--------------------------------------|
| <i>Actinobacteriota</i>                       | <b>0.502<sup>1</sup></b>             | 0.111                                 | -0.231                               |
| <i>Bacteriodota</i>                           | <b>-0.560</b>                        | <b>0.534</b>                          | 0.079                                |
| <i>Firmicutes</i>                             | 0.451                                | <b>-0.566</b>                         | 0.145                                |
| <i>Proteobacteria</i>                         | 0.116                                | 0.036                                 | <b>-0.586</b>                        |
| Other phyla                                   | -0.246                               | -0.244                                | 0.033                                |
| <b>Foods products and beverages</b>           |                                      |                                       |                                      |
| Grains, grain-based products                  | 0.136                                | -0.239                                | 0.025                                |
| Bread                                         | 0.207                                | 0.149                                 | -0.030                               |
| Potatoes                                      | 0.059                                | <b>0.633</b>                          | 0.027                                |
| Meat, offal                                   | 0.327                                | 0.110                                 | 0.003                                |
| Meat products                                 | 0.438                                | 0.012                                 | 0.247                                |
| Eggs                                          | -0.083                               | -0.255                                | -0.110                               |
| Fish                                          | 0.454                                | -0.123                                | 0.411                                |
| Fish products                                 | 0.355                                | -0.080                                | 0.166                                |
| Milk and milk products                        | 0.236                                | 0.201                                 | -0.236                               |
| Vegetable oils, plant- and ani-mal-based fats | -0.211                               | -0.282                                | -0.053                               |
| Vegetables                                    | -0.199                               | <b>0.526</b>                          | 0.317                                |
| Fruits, berries                               | -0.292                               | 0.181                                 | -0.079                               |
| Mushrooms                                     | -0.440                               | -0.041                                | -0.127                               |
| Legumes, nuts, seeds, milk alternatives       | -0.104                               | <b>-0.554</b>                         | -0.019                               |
| Sweets, bakery goods                          | <b>0.520</b>                         | 0.266                                 | -0.097                               |
| Condiments                                    | -0.316                               | -0.288                                | 0.040                                |
| Fast food, salty snacks                       | <b>0.600</b>                         | 0.221                                 | 0.232                                |
| Lemonades, energy drinks                      | 0.273                                | -0.056                                | <b>-0.533</b>                        |
| Coffee                                        | -0.168                               | 0.131                                 | 0.266                                |
| Tea                                           | -0.292                               | -0.219                                | 0.334                                |
| Water                                         | -0.388                               | 0.148                                 | -0.136                               |

<sup>1</sup> Rotated component matrix coefficients above 0.5 or less than -0.5 bolded as statistically significant values.

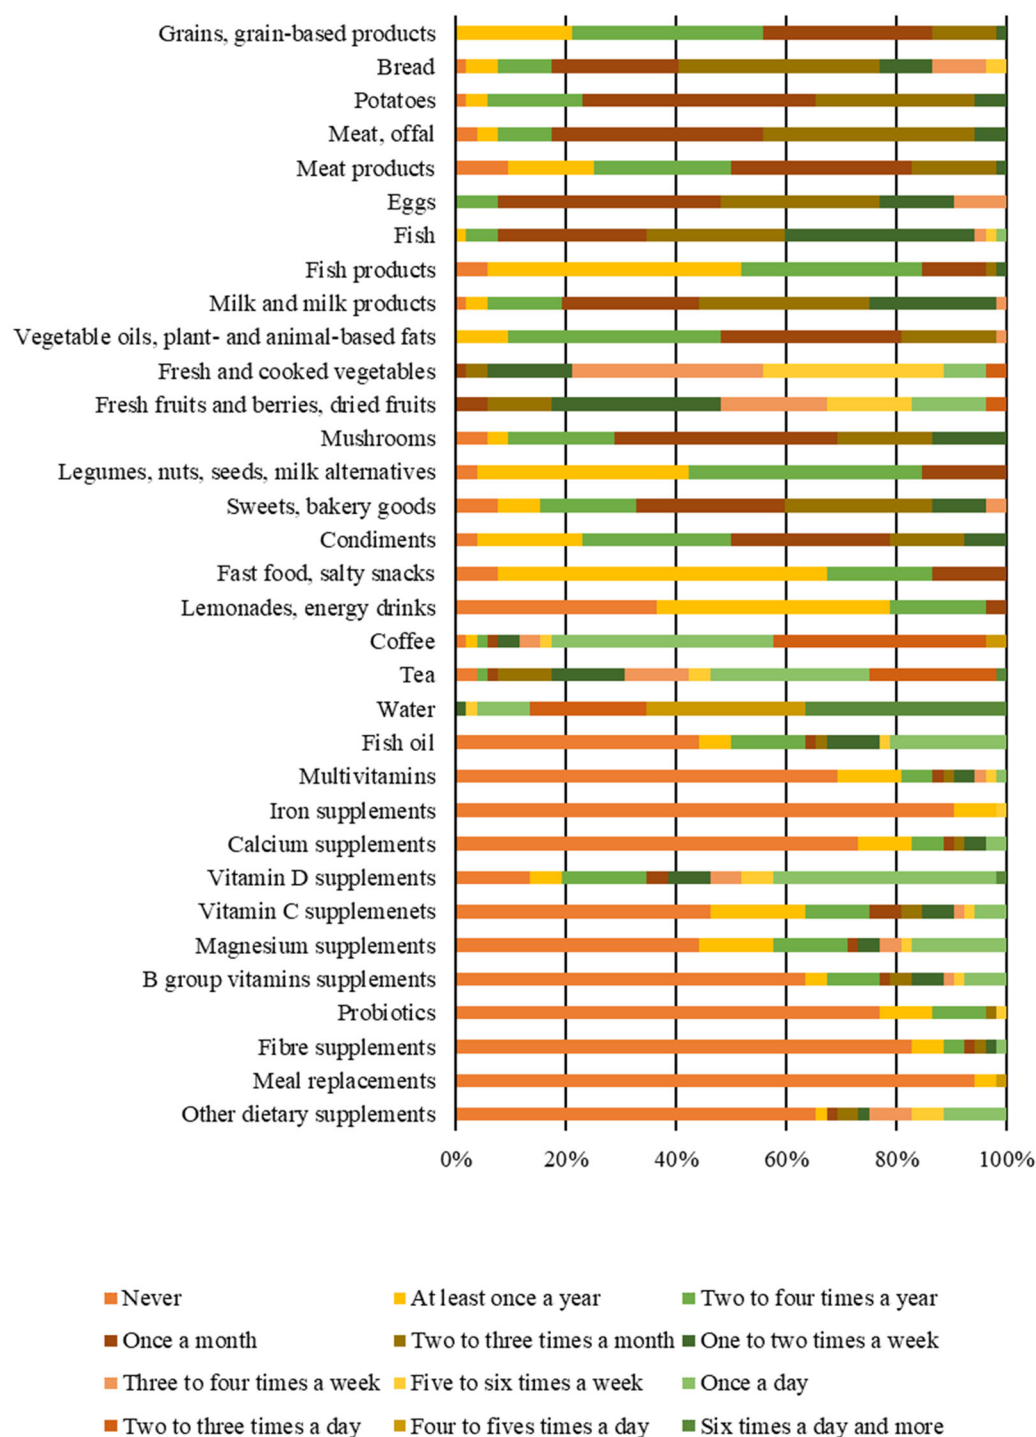

**Figure S1.** Average food, beverage and dietary supplements intake. Data from the food frequency questionnaire ( $n = 52$ ).
